# Supplementary material for: Integrated transcriptomic and proteomic analyses of a molecular mechanism of radular teeth biomineralization in Cryptochiton stelleri
Source: PubMed Central journal article supplement (PMC6351634; doi:10.1038/s41598-018-37839-2), 2019-01-29
Supplement: 41598_2018_37839_MOESM1_ESM.pdf [file 41598_2018_37839_MOESM1_ESM.pdf]

**Integrated transcriptomic and proteomic analyses of a  
molecular mechanism of radular teeth biomineralization in  
*Cryptochiton stelleri***

Michiko Nemoto, Dongni Ren, Steven Herrera, Songqin Pan, Takashi Tamura,  
Kenji Inagaki and David Kisailus



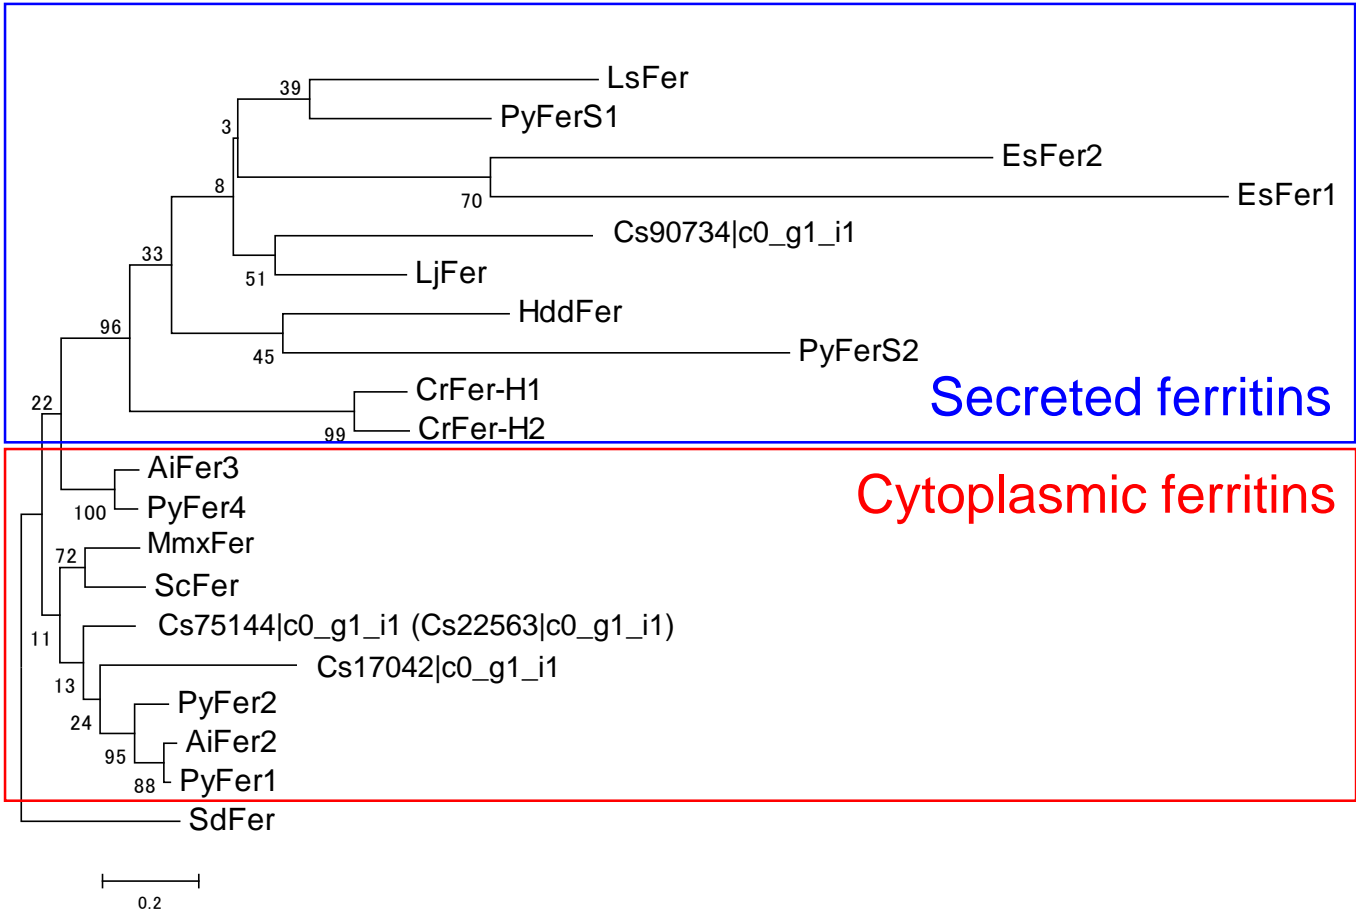

**Figure S2 Phylogenetic tree of *C. stelleri* ferritins with other ferritins from Mollusca and Arthropoda.**

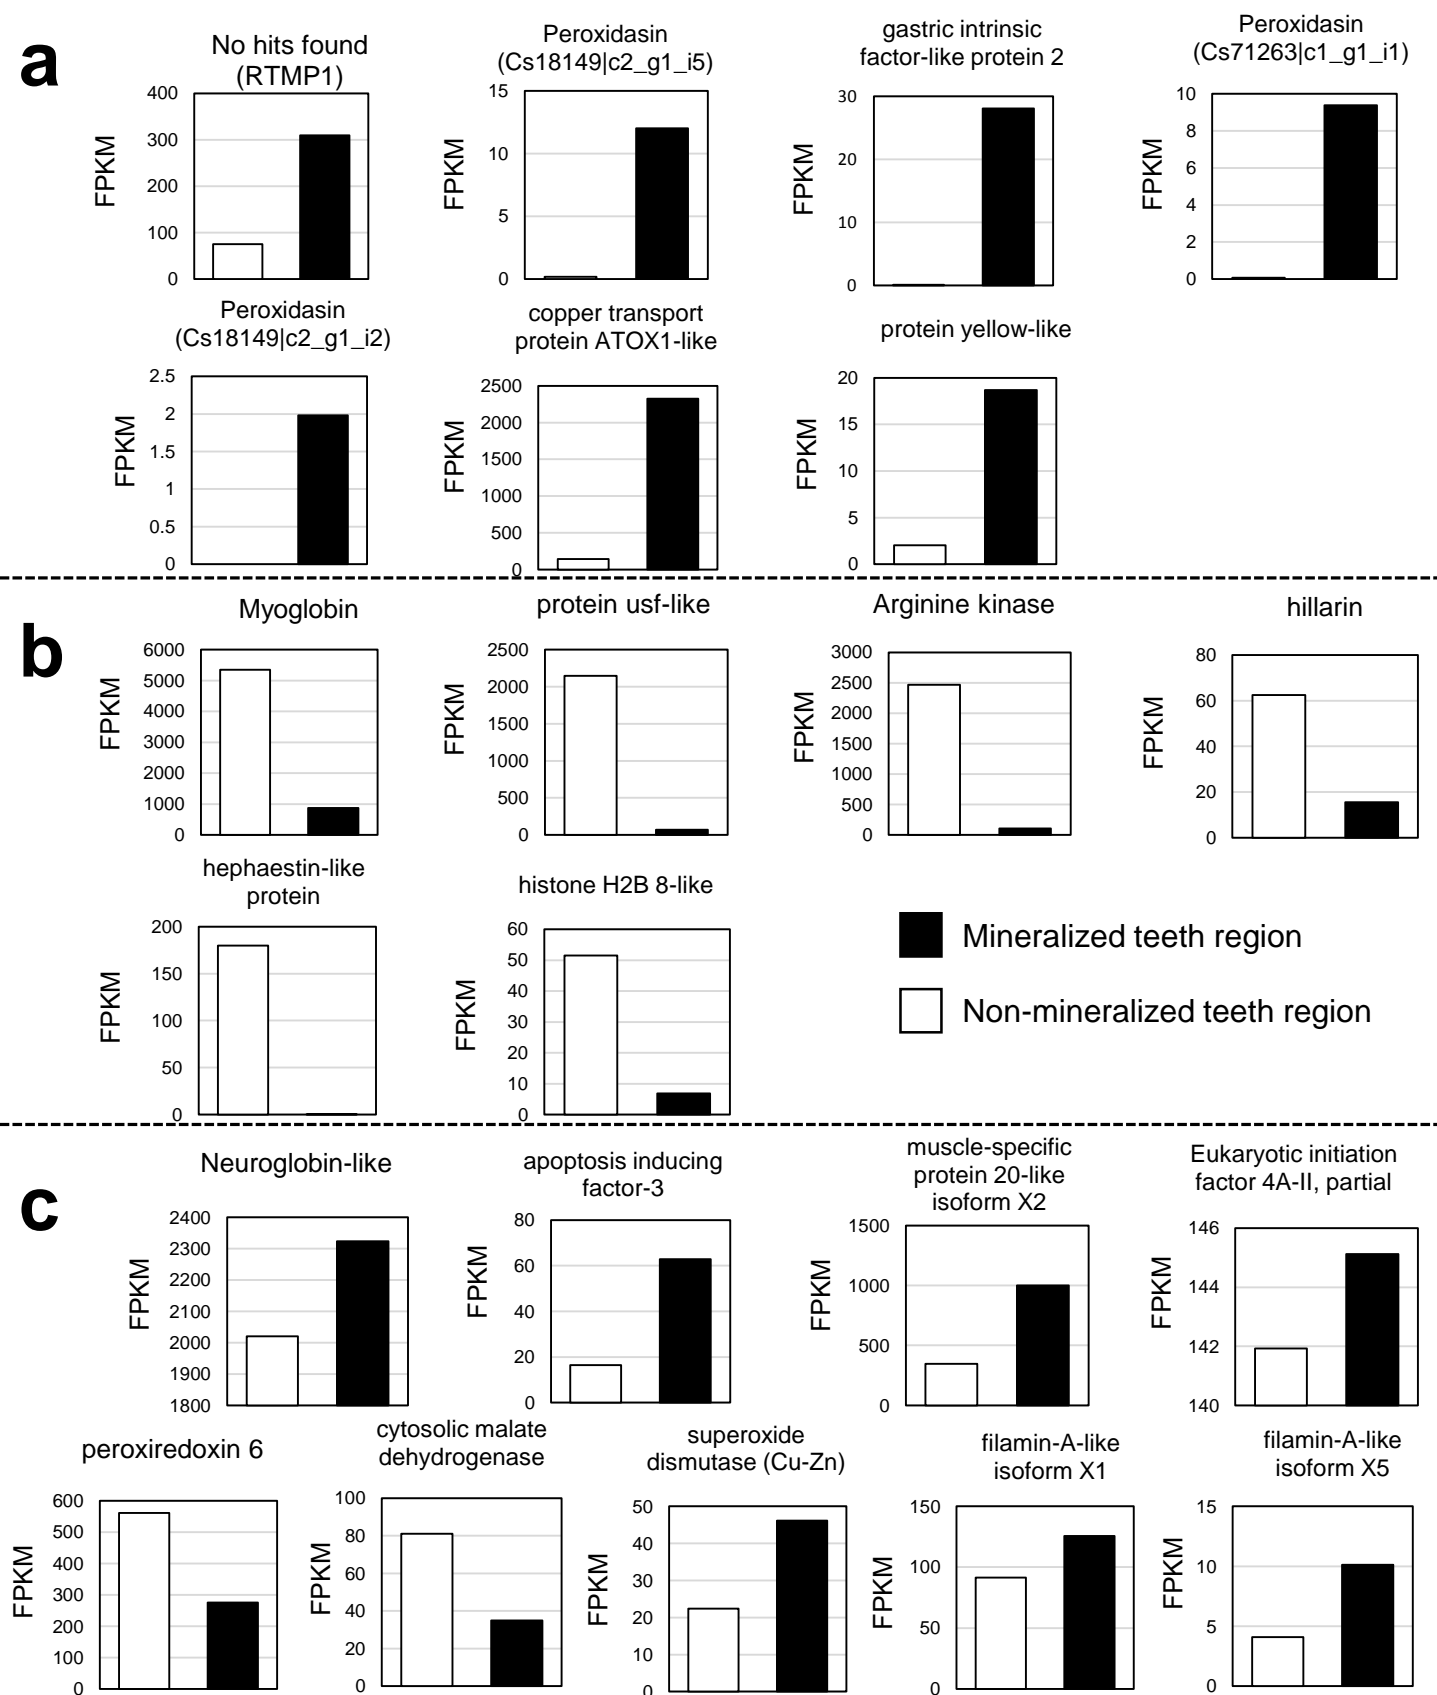

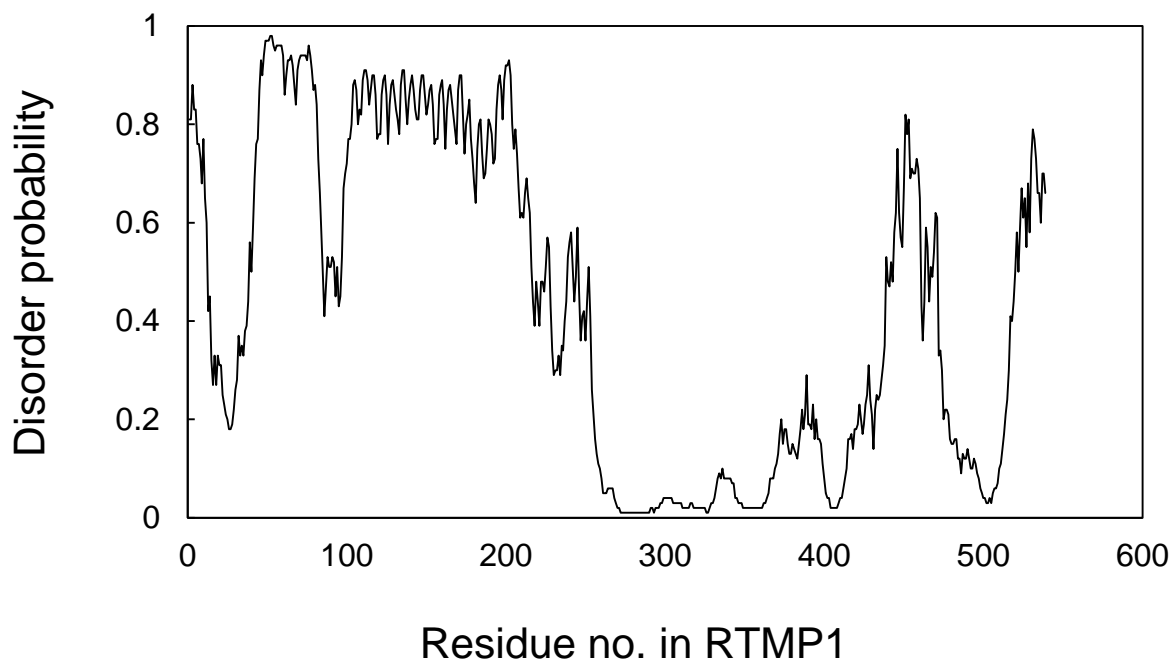

**Figure S4 Disorder regions in RTMP1 were predicted with DISOPRED3<sup>70</sup>.**



Table S1. List of the twenty most highly expressed transcripts in non-mineralized teeth region

| Transcript ID    | Annotation <sup>a</sup>                                                      | Best hit organisms           | E-value   | Function                                     |
|------------------|------------------------------------------------------------------------------|------------------------------|-----------|----------------------------------------------|
| Cs79475 c0_g1_i1 | peritrophin-1-like                                                           | <i>Lottia gigantea</i>       | 6.00E-76  | Unknown                                      |
| Cs17717 c0_g1_i5 | No hits found                                                                |                              |           | Unknown                                      |
| Cs17717 c0_g1_i3 | No hits found                                                                |                              |           | Unknown                                      |
| Cs17717 c0_g2_i1 | No hits found                                                                |                              |           | Unknown                                      |
| Cs37223 c0_g1_i1 | No hits found                                                                |                              |           | Unknown                                      |
| Cs70642 c0_g2_i1 | PREDICTED: peritrophin-44-like                                               | <i>Octopus bimaculoides</i>  | 4.00E-111 | peritrophic membrane protein, chitin-binding |
| Cs75144 c0_g1_i1 | ferritin subunit 2                                                           | <i>Hyriopsis schlegelii</i>  | 1.00E-102 | Iron storage                                 |
| Cs17717 c0_g1_i4 | No hits found                                                                |                              |           | Unknown                                      |
| Cs17717 c0_g1_i1 | No hits found                                                                |                              |           | Unknown                                      |
| Cs62747 c0_g1_i1 | PREDICTED: cell migration-inducing and hyaluronan-binding protein isoform X2 | <i>Erinaceus europaeus</i>   | 3.00E-180 | Regulation of cell migration                 |
| Cs77196 c0_g2_i1 | Myoglobin                                                                    | <i>Liolophura japonica</i>   | 4.00E-79  | Oxygen transport                             |
| Cs87163 c0_g1_i1 | No hits found                                                                |                              |           | Unknown                                      |
| Cs47470 c2_g3_i1 | Actin                                                                        | <i>Aplysia californica</i>   | 0         | Cytoskeletal protein                         |
| Cs37223 c0_g2_i1 | No hits found                                                                |                              |           | Unknown                                      |
| Cs17717 c0_g1_i2 | No hits found                                                                |                              |           | Unknown                                      |
| Cs76629 c0_g1_i1 | cytochrome c oxidase subunit I (mitochondrion)                               | <i>Cryptochiton stelleri</i> | 0         | Energy metabolism.                           |
| Cs24354 c0_g1_i1 | elongation factor 1 alpha                                                    | <i>Axinella verrucosa</i>    | 0         | transcription                                |
| Cs56877 c0_g1_i1 | Platelet glycoprotein Ib alpha chain, partial                                | <i>Stegodyphus mimosarum</i> | 2.00E-14  | surface membrane protein of platelets        |
| Cs25220 c1_g1_i1 | PREDICTED: protein PIF-like                                                  | <i>Octopus bimaculoides</i>  | 2.00E-85  | Aragonite biomineralization, chitin-binding  |
| Cs82664 c0_g1_i1 | Arginine kinase                                                              | <i>Liolophura japonica</i>   | 0         | phosphotransferase                           |

<sup>a</sup> Annotation is based on the results of BlastX analysis

Table S2. List of the twenty most highly expressed transcripts in mineralized teeth region

| Transcript ID    | Annotation <sup>a</sup>                          | Best hit organisms           | E-value   | Function                                   |
|------------------|--------------------------------------------------|------------------------------|-----------|--------------------------------------------|
| Cs58803 c0_g1_i1 | hypothetical protein OXYTRI_13058 (macronuclear) | <i>Oxytricha trifallax</i>   | 1.00E-167 | Unknown                                    |
| Cs76629 c0_g1_i1 | cytochrome c oxidase subunit I (mitochondrion)   | <i>Cryptochiton stelleri</i> | 0         | Energy metabolism.                         |
| Cs43066 c0_g1_i1 | cytochrome c oxidase subunit II (mitochondrion)  | <i>Cryptochiton stelleri</i> | 5.00E-149 | Energy metabolism.                         |
| Cs26640 c0_g1_i1 | cytochrome c oxidase subunit III (mitochondrion) | <i>Cryptochiton stelleri</i> | 8.00E-148 | Energy metabolism.                         |
| Cs43066 c1_g2_i1 | ATP synthase F0 subunit 6 (mitochondrion)        | <i>Cryptochiton stelleri</i> | 2.00E-116 | Energy metabolism.                         |
| Cs22243 c0_g6_i1 | No hits found                                    |                              |           | Unknown                                    |
| Cs22243 c0_g7_i3 | No hits found                                    |                              |           | Unknown                                    |
| Cs22243 c0_g7_i5 | No hits found                                    |                              |           | Unknown                                    |
| Cs22243 c0_g7_i6 | No hits found                                    |                              |           | Unknown                                    |
| Cs22243 c0_g7_i4 | No hits found                                    |                              |           | Unknown                                    |
| Cs45977 c0_g3_i1 | hypothetical protein X975_22095, partial         | <i>Stegodyphus mimosarum</i> | 3.00E-19  | Unknown                                    |
| Cs45977 c0_g2_i1 | hypothetical protein X975_22095, partial         | <i>Stegodyphus mimosarum</i> | 3.00E-18  | Unknown                                    |
| Cs22243 c0_g7_i2 | No hits found                                    |                              |           | Unknown                                    |
| Cs22243 c0_g5_i1 | No hits found                                    |                              |           | Unknown                                    |
| Cs71309 c7_g4_i1 | antileukoproteinase-like                         | <i>Sorex araneus</i>         | 5.00E-09  | Acid-stable proteinase inhibitor           |
| Cs46263 c1_g1_i1 | NADH dehydrogenase subunit 5 (mitochondrion)     | <i>Cryptochiton stelleri</i> | 0         | Energy metabolism.                         |
| Cs50074 c0_g1_i1 | NADH dehydrogenase subunit 1 (mitochondrion)     | <i>Cryptochiton stelleri</i> | 0         | Energy metabolism.                         |
| Cs12250 c0_g1_i1 | chitin binding beak protein 3                    | <i>Dosidicus gigas</i>       | 1.00E-09  | defines the squid beak mechanical gradient |
| Cs46263 c0_g1_i1 | cytochrome b (mitochondrion)                     | <i>Cryptochiton stelleri</i> | 0         | Energy metabolism.                         |
| Cs45977 c0_g1_i1 | hypothetical protein OCBIM_22005804mg            | <i>Octopus bimaculoides</i>  | 2.00E-25  | Unknown                                    |

<sup>a</sup> Annotation is based on the results of BlastX analysis



Table S3. Expression profiles of ferritin encoding transcripts in *C. stelleri*

| <b>Transcript ID</b> | <b>FPKM</b>            |                    |
|----------------------|------------------------|--------------------|
|                      | <b>Non-mineralized</b> | <b>Mineralized</b> |
| Cs22563 c0_g1_i1     | 113.11                 | 3.54               |
| Cs75144 c0_g1_i1     | 8240.36                | 238.32             |
| Cs17042 c0_g1_i1     | 15.29                  | 0.71               |
| Cs90734 c0_g1_i1     | 1.17                   | 0.8                |

Table S4. List of the proteins identified from mineralized cusp fraction of radular teeth in *Cryptochiton stelleri*

| Annotation <sup>a</sup>                                      | Best hit organisms              | E-value   | 1st analysis  |                    | 2nd analysis  |                    | Transcript ID    | FPKM (mineralized) | FPKM (non-mineralized) |
|--------------------------------------------------------------|---------------------------------|-----------|---------------|--------------------|---------------|--------------------|------------------|--------------------|------------------------|
|                                                              |                                 |           | Mascot scores | Number of peptides | Mascot scores | Number of peptides |                  |                    |                        |
| Neuroglobin-like                                             | <i>Actinia tenebrosa</i>        | 2.00E-25  | 845           | 4                  | 428           | 4                  | Cs77024 c0_g1_i1 | 2323.65            | 2020.22                |
|                                                              |                                 |           |               |                    |               |                    | Cs52177 c6_g1_i1 | 68.63              | 41.13                  |
| actin                                                        | <i>Modiolus modiolus</i>        | 1.00E-86  | 485           | 4                  |               |                    | Cs75591 c0_g1_i1 | 2.78               | 0.29                   |
| Actin                                                        | <i>Aplysia californica</i>      | 0         | 529           | 6                  | 237           | 4                  | Cs47470 c2_g3_i1 | 2810               | 5142.67                |
|                                                              |                                 |           |               |                    |               |                    | Cs47470 c1_g1_i1 | 54.41              | 68.29                  |
| ependymin-related protein 1-like                             | <i>Lottia gigantea</i>          | 1.00E-33  | 525           | 6                  | 345           | 5                  | Cs63606 c4_g2_i1 | 15.21              | 2.52                   |
|                                                              |                                 |           |               |                    |               |                    | Cs44691 c0_g1_i1 | 605.89             | 110.22                 |
| inter-alpha-trypsin inhibitor heavy chain H3-like isoform X2 | <i>Lingula anatina</i>          | 3.00E-145 | 452           | 4                  | 269           | 6                  | Cs47656 c0_g1_i2 | 17.7               | 2.27                   |
|                                                              |                                 |           |               |                    |               |                    | Cs47656 c0_g1_i1 | 112                | 2.24                   |
| filamin-A isoform X14                                        | <i>Crassostrea gigas</i>        | 0         | 453           | 7                  | 163           | 3                  | Cs22318 c0_g1_i1 | 66.57              | 125.82                 |
| tubulin beta chain                                           | <i>Hydra vulgaris</i>           | 0         | 333           | 5                  | 150           | 3                  | Cs54304 c1_g2_i5 | 101.68             | 647.37                 |
|                                                              |                                 |           |               |                    |               |                    | Cs71671 c4_g2_i1 | 1.33               | 0                      |
|                                                              |                                 |           |               |                    |               |                    | Cs71671 c4_g2_i3 | 0                  | 1.4                    |
|                                                              |                                 |           |               |                    |               |                    | Cs71671 c4_g2_i4 | 0                  | 1.49                   |
|                                                              |                                 |           |               |                    |               |                    | Cs71671 c4_g2_i5 | 0                  | 7.36                   |
| Myoglobin                                                    | <i>Liolophura japonica</i>      | 3.00E-84  | 387           | 4                  | 234           | 3                  | Cs77196 c0_g1_i1 | 75.14              | 140.63                 |
|                                                              |                                 |           |               |                    |               |                    | Cs78790 c0_g1_i1 | 29.05              | 124.08                 |
|                                                              |                                 |           |               |                    |               |                    | Cs77196 c0_g2_i1 | 874.48             | 5345.03                |
| protein usf-like                                             | <i>Octopus bimaculoides</i>     | 1.00E-101 | 331           | 5                  | 54            | 1                  | Cs75674 c0_g4_i1 | 67.74              | 2144.29                |
|                                                              |                                 |           |               |                    |               |                    | Cs81542 c0_g1_i1 | 0.78               | 45.96                  |
| alpha tubulin-like                                           | <i>Lottia gigantea</i>          | 0         |               |                    | 200           | 3                  | Cs88263 c0_g1_i1 | 189.83             | 1835.9                 |
|                                                              |                                 |           |               |                    |               |                    | Cs92361 c0_g1_i1 | 0                  | 10.36                  |
| alpha tubulin-like                                           | <i>Saccoglossus kowalevskii</i> | 0         | 278           | 3                  | 212           | 3                  | Cs88263 c0_g1_i2 | 603.6              | 1986.65                |
|                                                              |                                 |           |               |                    |               |                    | Cs88263 c1_g1_i1 | 0.97               | 16.82                  |
|                                                              |                                 |           |               |                    |               |                    | Cs88263 c1_g1_i2 | 7.73               | 13.5                   |
| zonadhesin-like                                              | <i>Parus major</i>              | 2.00E-26  | 147           | 2                  | 139           | 3                  | Cs23761 c3_g1_i1 | 2473.16            | 14.36                  |
|                                                              |                                 |           |               |                    |               |                    | Cs19070 c4_g1_i2 | 39.29              | 1.14                   |
| fibrillin-2-like                                             | <i>Lingula anatina</i>          | 0         | 250           | 4                  | 150           | 3                  | Cs22298 c0_g1_i2 | 5.07               | 0.31                   |
|                                                              |                                 |           |               |                    |               |                    | Cs22298 c0_g1_i4 | 0.97               | 0.05                   |
| Arginine kinase                                              | <i>Liolophura japonica</i>      | 0         | 189           | 4                  | 178           | 2                  | Cs82664 c0_g1_i1 | 104.69             | 2469.32                |
|                                                              |                                 |           |               |                    |               |                    | Cs79589 c0_g2_i1 | 0                  | 16.41                  |
|                                                              |                                 |           |               |                    |               |                    | Cs79589 c0_g1_i1 | 1.66               | 22.46                  |
| CD109 antigen-like isoform X1                                | <i>Crassostrea gigas</i>        | 0         | 160           | 3                  |               |                    | Cs41242 c0_g1_i2 | 333.61             | 2.37                   |
|                                                              |                                 |           |               |                    |               |                    | Cs41242 c0_g1_i1 | 22.1               | 0                      |
| Peroxidasin                                                  | <i>Crassostrea gigas</i>        | 0         | 173           | 3                  | 195           | 3                  | Cs18149 c2_g1_i3 | 4.81               | 0                      |
|                                                              |                                 |           |               |                    |               |                    | Cs18149 c2_g1_i5 | 12.02              | 0.18                   |
| CD109 antigen-like isoform X2                                | <i>Crassostrea gigas</i>        | 0         | 163           | 3                  | 398           | 9                  | Cs78436 c2_g1_i1 | 110.87             | 0.26                   |
| protein PIF-like                                             | <i>Lottia gigantea</i>          | 1.00E-35  |               |                    | 105           | 1                  | Cs55300 c0_g1_i1 | 0.3                | 0                      |
|                                                              |                                 |           |               |                    |               |                    | Cs55300 c0_g1_i2 | 1.94               | 0                      |

|                                                             |                                  |           |     |   |     |   |                  |         |        |
|-------------------------------------------------------------|----------------------------------|-----------|-----|---|-----|---|------------------|---------|--------|
| tubulin beta-4B chain-like isoform X1                       | <i>Acanthaster planci</i>        | 0.00E+00  | 179 | 2 | 160 | 3 | Cs71671 c1_g3_i1 | 2.59    | 4.37   |
|                                                             |                                  |           |     |   |     |   | Cs71671 c1_g2_i1 | 54.54   | 211.44 |
| inter-alpha-trypsin inhibitor heavy chain H4, partial       | <i>Acanthisitta chloris</i>      | 1.00E-09  | 127 | 2 | 98  | 2 | Cs48764 c0_g1_i1 | 1.01    | 0.26   |
| uncharacterized protein LOC111636702                        | <i>Centruroides sculpturatus</i> | 4.00E-05  | 138 | 2 | 86  | 1 | Cs17650 c1_g2_i1 | 8.73    | 0      |
|                                                             |                                  |           |     |   |     |   | Cs34146 c1_g1_i1 | 495.85  | 0.02   |
|                                                             |                                  |           |     |   |     |   | Cs34146 c1_g1_i2 | 436.38  | 0.02   |
| No hits found                                               |                                  |           | 93  | 1 | 233 | 4 | Cs75160 c0_g1_i1 | 11.77   | 0      |
|                                                             |                                  |           |     |   |     |   | Cs80392 c0_g1_i1 | 786.93  | 0      |
| protein PIF isoform X2                                      | <i>Crassostrea gigas</i>         | 1.00E-46  |     |   | 70  | 1 | Cs55300 c1_g1_i1 | 1.38    | 0      |
| No hits found                                               |                                  |           | 126 | 2 | 88  | 1 | Cs68435 c0_g1_i2 | 56.26   | 316.81 |
|                                                             |                                  |           |     |   |     |   | Cs68435 c0_g1_i1 | 309.95  | 75     |
|                                                             |                                  |           |     |   |     |   | Cs11532 c0_g1_i1 | 1.11    | 1.95   |
|                                                             |                                  |           |     |   |     |   | Cs93074 c3_g1_i1 | 5.43    | 4.9    |
| lysosomal aspartic protease isoform X1                      | <i>Crassostrea gigas</i>         | 0         | 122 | 2 |     |   | Cs54082 c4_g3_i5 | 70.7    | 40.45  |
|                                                             |                                  |           |     |   |     |   | Cs64530 c0_g1_i1 | 1.22    | 0      |
|                                                             |                                  |           |     |   |     |   | Cs64530 c0_g1_i3 | 0.81    | 0.59   |
| protein yellow-like                                         | <i>Lingula anatina</i>           | 3.00E-103 | 109 | 1 | 90  | 1 | Cs83384 c0_g1_i1 | 18.69   | 2.05   |
| melanotransferrin-like                                      | <i>Aplysia californica</i>       | 8.00E-28  | 118 | 1 |     |   | Cs33876 c0_g1_i1 | 55.79   | 46.56  |
|                                                             |                                  |           |     |   |     |   | Cs33876 c0_g1_i2 | 104.35  | 35.82  |
|                                                             |                                  |           |     |   |     |   | Cs35685 c0_g1_i1 | 4.7     | 1.26   |
| cell migration-inducing and hyaluronan-binding protein-like | <i>Branchiostoma belcheri</i>    | 3.00E-125 | 116 | 1 |     |   | Cs72782 c0_g1_i1 | 0.08    | 402.97 |
|                                                             |                                  |           |     |   |     |   | Cs68459 c0_g1_i2 | 0.02    | 2.33   |
|                                                             |                                  |           |     |   |     |   | Cs68459 c0_g1_i1 | 0       | 3.7    |
| Peroxidasin                                                 | <i>Mizuhopecten yessoensis</i>   | 1.00E-19  | 102 | 2 | 111 | 3 | Cs18149 c2_g1_i2 | 1.98    | 0      |
| hypothetical protein LOTGIDRAFT_236297                      | <i>Lottia gigantea</i>           | 3.00E-40  | 72  | 1 | 67  | 1 | Cs88032 c0_g1_i1 | 38.08   | 0.29   |
|                                                             |                                  |           |     |   |     |   | Cs88032 c0_g1_i2 | 23.79   | 0.1    |
| gastric intrinsic factor-like protein 2                     | <i>Hyriopsis cumingii</i>        | 2.00E-35  | 114 | 1 | 56  | 1 | Cs62719 c1_g8_i1 | 28.05   | 0.08   |
| apoptosis inducing factor-3                                 | <i>Haliotis discus discus</i>    | 0.00E+00  | 95  | 1 | 98  | 2 | Cs58153 c0_g2_i1 | 43.99   | 19.63  |
|                                                             |                                  |           |     |   |     |   | Cs24699 c0_g2_i2 | 2.4     | 0      |
|                                                             |                                  |           |     |   |     |   | Cs24699 c0_g2_i1 | 4.73    | 1.61   |
|                                                             |                                  |           |     |   |     |   | Cs58153 c0_g2_i2 | 61.69   | 0      |
|                                                             |                                  |           |     |   |     |   | Cs58153 c0_g2_i3 | 1.11    | 0      |
|                                                             |                                  |           |     |   |     |   | Cs58153 c0_g2_i4 | 0       | 18.88  |
|                                                             |                                  |           |     |   |     |   | Cs58153 c0_g2_i5 | 62.87   | 16.52  |
|                                                             |                                  |           |     |   |     |   | Cs58153 c0_g2_i6 | 0       | 11.62  |
|                                                             |                                  |           |     |   |     |   | Cs58153 c0_g2_i7 | 0       | 0      |
|                                                             |                                  |           |     |   |     |   | Cs58153 c0_g2_i8 | 0       | 0      |
| copper transport protein ATOX1-like                         | <i>Exaiptasia pallida</i>        | 3.00E-27  | 109 | 1 | 104 | 1 | Cs22616 c0_g1_i1 | 2324.41 | 144.53 |
|                                                             |                                  |           |     |   |     |   | Cs78473 c8_g1_i1 | 61.37   | 2.87   |
| hillarin                                                    | <i>Crassostrea virginica</i>     | 0         | 83  | 1 | 61  | 1 | Cs28725 c1_g1_i1 | 15.52   | 62.53  |
|                                                             |                                  |           |     |   |     |   | Cs28725 c1_g1_i2 | 17.63   | 33.26  |
|                                                             |                                  |           |     |   |     |   | Cs30794 c0_g1_i1 | 0       | 1.95   |

|                                             |                                     |           |    |   |     |   |                  |         |         |
|---------------------------------------------|-------------------------------------|-----------|----|---|-----|---|------------------|---------|---------|
| 14-3-3 protein epsilon                      | <i>Dendroctonus ponderosae</i>      | 2.00E-148 |    |   | 101 | 1 | Cs49664 c0_g1_i1 | 2.48    | 2.2     |
|                                             |                                     |           |    |   |     |   | Cs49664 c0_g2_i1 | 0       | 0       |
|                                             |                                     |           |    |   |     |   | Cs54082 c5_g1_i1 | 93.23   | 152.62  |
| chitin binding beak protein 3               | <i>Dosidicus gigas</i>              | 5.00E-10  |    |   | 52  | 1 | Cs12250 c0_g1_i1 | 3170.58 | 0.28    |
|                                             |                                     |           |    |   |     |   | Cs71549 c0_g1_i1 | 87.72   | 0       |
| muscle-specific protein 20-like isoform X2  | <i>Lingula anatina</i>              | 7.00E-91  | 97 | 1 | 74  | 1 | Cs50425 c0_g1_i2 | 17.41   | 6.06    |
|                                             |                                     |           |    |   |     |   | Cs84529 c0_g2_i1 | 999.04  | 345.27  |
| Eukaryotic initiation factor 4A-II, partial | <i>Stegodyphus mimosarum</i>        | 0         | 95 | 1 | 85  | 1 | Cs18720 c0_g1_i1 | 3.86    | 3.55    |
|                                             |                                     |           |    |   |     |   | Cs59400 c0_g1_i1 | 145.13  | 141.93  |
| histone H2B 8-like                          | <i>Protobothrops mucrosquamatus</i> | 2.00E-68  | 91 | 1 | 127 | 1 | Cs55212 c0_g1_i2 | 4.08    | 0       |
|                                             |                                     |           |    |   |     |   | Cs55212 c0_g1_i1 | 1.61    | 0.49    |
|                                             |                                     |           |    |   |     |   | Cs74134 c0_g2_i1 | 0.52    | 15.62   |
|                                             |                                     |           |    |   |     |   | Cs74134 c0_g2_i2 | 6.85    | 51.47   |
|                                             |                                     |           |    |   |     |   | Cs74134 c0_g2_i4 | 0.31    | 9.28    |
|                                             |                                     |           |    |   |     |   | Cs74134 c0_g2_i5 | 3.21    | 2.81    |
|                                             |                                     |           |    |   |     |   | Cs74134 c0_g2_i6 | 7.35    | 3.45    |
|                                             |                                     |           |    |   |     |   | Cs74134 c0_g3_i1 | 2.27    | 2.79    |
| lysosomal alpha-mannosidase                 | <i>Crassostrea gigas</i>            | 0         |    |   | 82  | 1 | Cs17642 c2_g1_i1 | 42.49   | 36.06   |
|                                             |                                     |           |    |   |     |   | Cs26650 c0_g1_i2 | 0.28    | 0.4     |
| neurexin-4-like                             | <i>Mizuhopecten yessoensis</i>      | 0         |    |   | 81  | 1 | Cs29485 c0_g1_i1 | 37.55   | 40.55   |
|                                             |                                     |           |    |   |     |   | Cs43558 c0_g1_i1 | 1.23    | 0.42    |
| ubiquitin family protein                    | <i>Oikopleura dioica</i>            | 2.00E-128 |    |   | 79  | 1 | Cs59998 c2_g1_i3 | 9.08    | 11.73   |
|                                             |                                     |           |    |   |     |   | Cs16655 c0_g1_i1 | 30.64   | 19.34   |
|                                             |                                     |           |    |   |     |   | Cs39013 c0_g1_i1 | 0       | 4.67    |
|                                             |                                     |           |    |   |     |   | Cs39013 c0_g2_i1 | 0.85    | 0.92    |
|                                             |                                     |           |    |   |     |   | Cs39013 c0_g3_i1 | 2.96    | 4.43    |
|                                             |                                     |           |    |   |     |   | Cs84216 c0_g1_i3 | 19.88   | 21.84   |
|                                             |                                     |           |    |   |     |   | Cs84800 c0_g1_i1 | 38.16   | 25      |
|                                             |                                     |           |    |   |     |   | Cs91127 c0_g1_i1 | 397.69  | 212.55  |
|                                             |                                     |           |    |   |     |   | Cs91127 c0_g2_i1 | 0       | 252.71  |
|                                             |                                     |           |    |   |     |   | Cs91127 c0_g3_i1 | 561.52  | 318.04  |
|                                             |                                     |           |    |   |     |   | Cs59998 c1_g1_i2 | 288.81  | 330.36  |
|                                             |                                     |           |    |   |     |   | Cs59998 c1_g1_i4 | 1234.58 | 652.14  |
|                                             |                                     |           |    |   |     |   | Cs84216 c0_g1_i2 | 2.17    | 1.83    |
|                                             |                                     |           |    |   |     |   | Cs59998 c1_g1_i1 | 2018.71 | 2111.01 |
|                                             |                                     |           |    |   |     |   | Cs84216 c0_g1_i1 | 53.85   | 152.12  |
|                                             |                                     |           |    |   |     |   | Cs59998 c1_g1_i3 | 248.35  | 304.91  |
|                                             |                                     |           |    |   |     |   | Cs59998 c2_g1_i2 | 13.27   | 8.81    |
|                                             |                                     |           |    |   |     |   | Cs59998 c2_g1_i5 | 2.34    | 2.23    |
|                                             |                                     |           |    |   |     |   | Cs59998 c2_g1_i1 | 23.16   | 9.17    |
|                                             |                                     |           |    |   |     |   | Cs59998 c2_g1_i4 | 0.55    | 0       |
| Cs13896 c0_g1_i1                            | 705.54                              | 508.63    |    |   |     |   |                  |         |         |

|                                                    |                                |           |    |   |     |   |                   |         |         |
|----------------------------------------------------|--------------------------------|-----------|----|---|-----|---|-------------------|---------|---------|
| hypothetical protein<br>LOTGIDRAFT_171050          | <i>Lottia gigantea</i>         | 2.00E-20  | 90 | 1 |     |   | Cs27910 c6_g1_i2  | 3.71    | 1.05    |
|                                                    |                                |           |    |   |     |   | Cs85075 c0_g1_i1  | 289.36  | 45.69   |
|                                                    |                                |           |    |   |     |   | Cs85075 c0_g1_i2  | 304.44  | 118.11  |
|                                                    |                                |           |    |   |     |   | Cs85075 c0_g1_i3  | 122.72  | 14.49   |
|                                                    |                                |           |    |   |     |   | Cs27910 c6_g1_i1  | 10.98   | 1.82    |
|                                                    |                                |           |    |   |     |   | Cs85075 c0_g1_i4  | 105.51  | 15.21   |
| hephaestin-like protein                            | <i>Stylophora pistillata</i>   | 0         | 90 | 1 | 84  | 2 | Cs46312 c2_g1_i1  | 0.27    | 179.74  |
|                                                    |                                |           |    |   |     |   | Cs77488 c0_g2_i1  | 0       | 3.47    |
| EGF-like domain-containing<br>protein 2 isoform X3 | <i>Octopus bimaculoides</i>    | 1.00E-25  | 89 | 1 |     |   | Cs28544 c0_g2_i1  | 17.45   | 1.57    |
|                                                    |                                |           |    |   |     |   | Cs79867 c0_g1_i1  | 1.4     | 0.41    |
| elongation factor 1 alpha                          | <i>Axinella verrucosa</i>      | 0         | 73 | 2 | 55  | 1 | Cs24354 c0_g1_i1  | 1819.62 | 3625.82 |
|                                                    |                                |           |    |   |     |   | Cs83769 c0_g1_i1  | 29.02   | 47.26   |
| cathepsin Z-like                                   | <i>Mizuhopecten yessoensis</i> | 2.00E-151 | 85 | 1 |     |   | Cs50066 c0_g1_i1  | 130.55  | 55.51   |
|                                                    |                                |           |    |   |     |   | Cs38675 c0_g1_i1  | 2.76    | 1.09    |
| gelsolin-like protein 2                            | <i>Acanthaster planci</i>      | 1.00E-155 | 84 | 1 |     |   | Cs37973 c0_g2_i1  | 1.21    | 12.73   |
|                                                    |                                |           |    |   |     |   | Cs45844 c0_g1_i1  | 107.29  | 356.86  |
|                                                    |                                |           |    |   |     |   | Cs45844 c0_g1_i2  | 0       | 114.49  |
|                                                    |                                |           |    |   |     |   | Cs75047 c0_g2_i1  | 17.44   | 10.56   |
|                                                    |                                |           |    |   |     |   | Cs78032 c0_g1_i1  | 2.1     | 1.45    |
|                                                    |                                |           |    |   |     |   | Cs75047 c0_g1_i1  | 35      | 11.06   |
|                                                    |                                |           |    |   |     |   | Cs75047 c0_g1_i2  | 19.62   | 0       |
|                                                    |                                |           |    |   |     |   | Cs75047 c0_g1_i3  | 9.22    | 25.47   |
| filamin-A-like isoform X1                          | <i>Biomphalaria glabrata</i>   | 0         | 75 | 1 | 147 | 2 | Cs54305 c0_g1_i2  | 125.51  | 91.37   |
|                                                    |                                |           |    |   |     |   | Cs54305 c0_g1_i1  | 5.54    | 9.2     |
|                                                    |                                |           |    |   |     |   | Cs86837 c0_g1_i1  | 2.92    | 1.5     |
| radixin isoform X3                                 | <i>Crassostrea gigas</i>       | 0         | 63 | 1 |     |   | Cs19220 c1_g1_i1  | 162.74  | 221.31  |
|                                                    |                                |           |    |   |     |   | Cs68499 c0_g2_i1  | 3.74    | 4.87    |
| filamin-A-like isoform X3                          | <i>Crassostrea virginica</i>   | 0.00E+00  | 78 | 1 |     |   | Cs53984 c1_g2_i4  | 0       | 0       |
|                                                    |                                |           |    |   |     |   | Cs26775 c0_g1_i1  | 0.4     | 1.24    |
|                                                    |                                |           |    |   |     |   | Cs53984 c1_g2_i10 | 0       | 8.84    |
|                                                    |                                |           |    |   |     |   | Cs53984 c1_g2_i11 | 7.35    | 0       |
|                                                    |                                |           |    |   |     |   | Cs53984 c1_g2_i3  | 4.73    | 3.48    |
|                                                    |                                |           |    |   |     |   | Cs53984 c1_g2_i7  | 3.27    | 3.2     |
|                                                    |                                |           |    |   |     |   | Cs53984 c1_g2_i9  | 0.82    | 12.38   |
| peroxiredoxin 6                                    | <i>Cristaria plicata</i>       | 4.00E-119 | 77 | 2 | 93  | 2 | Cs59318 c0_g1_i1  | 274.95  | 561.11  |
|                                                    |                                |           |    |   |     |   | Cs83444 c0_g1_i1  | 3.9     | 5.94    |
| Peroxidasin                                        | <i>Crassostrea gigas</i>       | 0         | 55 | 1 | 70  | 1 | Cs71263 c1_g1_i1  | 9.37    | 0.08    |
|                                                    |                                |           |    |   |     |   | Cs71263 c1_g1_i8  | 6.11    | 0.07    |
| galaxin-like                                       | <i>Acropora digitifera</i>     | 1.00E-12  | 71 | 1 |     |   | Cs12196 c0_g1_i1  | 107.08  | 0.07    |
|                                                    |                                |           |    |   |     |   | Cs13013 c0_g1_i1  | 4.34    | 0       |
|                                                    |                                |           |    |   |     |   | Cs76396 c0_g2_i1  | 9.68    | 43.42   |
|                                                    |                                |           |    |   |     |   | Cs73246 c0_g2_i1  | 0       | 0.81    |

|                                                            |                                  |           |    |   |     |   |                   |         |        |
|------------------------------------------------------------|----------------------------------|-----------|----|---|-----|---|-------------------|---------|--------|
| thioredoxin peroxidase                                     | <i>Artemia franciscana</i>       | 1.00E-116 | 70 | 1 |     |   | Cs73246 c0_g3_i1  | 0.33    | 0.38   |
|                                                            |                                  |           |    |   |     |   | Cs73246 c0_g4_i1  | 0.47    | 0      |
|                                                            |                                  |           |    |   |     |   | Cs76396 c0_g1_i1  | 3.63    | 41.8   |
|                                                            |                                  |           |    |   |     |   | Cs73246 c0_g1_i1  | 0.5     | 1.06   |
|                                                            |                                  |           |    |   |     |   | Cs76396 c0_g3_i1  | 10.78   | 3.51   |
|                                                            |                                  |           |    |   |     |   | Cs76396 c0_g4_i1  | 17      | 31.17  |
|                                                            |                                  |           |    |   |     |   | Cs76396 c0_g5_i1  | 7.64    | 16.82  |
| superoxide dismutase (Cu-Zn)                               | <i>Drosophila sechellia</i>      | 6.00E-46  | 76 | 1 | 190 | 2 | Cs69741 c0_g1_i1  | 46.09   | 22.35  |
| retrograde protein of 51 kDa-like isoform X4               | <i>Crassostrea virginica</i>     | 3.00E-136 | 70 | 1 | 70  | 1 | Cs20050 c0_g2_i1  | 33.69   | 1.12   |
|                                                            |                                  |           |    |   |     |   | Cs34327 c0_g1_i1  | 1683.79 | 60.17  |
| peptidyl-prolyl cis-trans isomerase-like                   | <i>Stylophora pistillata</i>     | 1.00E-89  | 57 | 1 |     |   | Cs67145 c0_g1_i1  | 319.14  | 362.41 |
|                                                            |                                  |           |    |   |     |   | Cs30224 c0_g1_i1  | 6.07    | 4.7    |
| filamin-A-like isoform X5                                  | <i>Crassostrea virginica</i>     | 2.00E-104 | 69 | 1 | 132 | 2 | Cs53984 c1_g2_i1  | 4.69    | 3.34   |
|                                                            |                                  |           |    |   |     |   | Cs53984 c1_g2_i6  | 6.78    | 5.64   |
|                                                            |                                  |           |    |   |     |   | Cs53984 c1_g2_i8  | 10.13   | 4.09   |
| CKLF-like MARVEL transmembrane domain-containing protein 4 | <i>Lingula anatina</i>           | 8.00E-38  |    |   | 97  | 1 | Cs93043 c0_g1_i1  | 9.57    | 0      |
|                                                            |                                  |           |    |   |     |   | Cs93043 c0_g1_i2  | 6.74    | 5.05   |
| Profilin                                                   | <i>Tuber melanosporum Mel28</i>  | 3.00E-10  |    |   | 67  | 1 | Cs35744 c0_g2_i1  | 4.1     | 4.57   |
|                                                            |                                  |           |    |   |     |   | Cs35744 c0_g1_i1  | 1.07    | 0      |
|                                                            |                                  |           |    |   |     |   | Cs93141 c42_g7_i1 | 168.38  | 243.11 |
| triosephosphate isomerase-like                             | <i>Branchiostoma belcheri</i>    | 1.00E-133 |    |   | 66  | 1 | Cs62667 c1_g1_i1  | 24.59   | 63.64  |
|                                                            |                                  |           |    |   |     |   | Cs41497 c0_g2_i1  | 0.16    | 0.72   |
|                                                            |                                  |           |    |   |     |   | Cs41497 c0_g3_i1  | 0.16    | 0      |
|                                                            |                                  |           |    |   |     |   | Cs41497 c0_g1_i1  | 0.16    | 1.08   |
| CD109 antigen-like                                         | <i>Lottia gigantea</i>           | 0         |    |   | 64  | 1 | Cs93025 c0_g1_i1  | 7.22    | 21.47  |
| clathrin heavy chain 1 isoform X2                          | <i>Mizuhopecten yessoensis</i>   | 0         | 64 | 1 |     |   | Cs59011 c0_g1_i2  | 21.69   | 33.63  |
|                                                            |                                  |           |    |   |     |   | Cs59011 c0_g1_i1  | 16.73   | 24.6   |
| ubiquitin, partial (macronuclear)                          | <i>Nyctotherus ovalis</i>        | 7.00E-72  | 61 | 1 |     |   | Cs70580 c0_g2_i1  | 1.53    | 0      |
| cytosolic malate dehydrogenase                             | <i>Mytilus galloprovincialis</i> | 3.00E-176 | 61 | 1 | 59  | 1 | Cs28687 c2_g1_i1  | 34.88   | 81.1   |
|                                                            |                                  |           |    |   |     |   | Cs21624 c0_g1_i1  | 0.94    | 1.56   |
| ADP-ribosylation factor 1-like isoform X3                  | <i>Saccoglossus kowalevskii</i>  | 2.00E-117 |    |   | 58  | 1 | Cs22952 c1_g1_i1  | 2.86    | 3.71   |
|                                                            |                                  |           |    |   |     |   | Cs87098 c0_g1_i1  | 125.7   | 195.08 |
| 14-3-3 protein zeta isoform X1                             | <i>Dinoponera quadriceps</i>     | 1.00E-130 |    |   | 53  | 1 | Cs74650 c0_g1_i1  | 182.51  | 195.15 |
|                                                            |                                  |           |    |   |     |   | Cs84401 c0_g1_i1  | 5.71    | 4.62   |
| nucleolin-like                                             | <i>Lingula anatina</i>           | 8.00E-31  |    |   | 52  | 1 | Cs73306 c0_g1_i3  | 113.67  | 238.35 |
|                                                            |                                  |           |    |   |     |   | Cs21433 c0_g1_i2  | 3.39    | 4.94   |
|                                                            |                                  |           |    |   |     |   | Cs21433 c0_g1_i4  | 0.93    | 0.37   |
|                                                            |                                  |           |    |   |     |   | Cs73306 c0_g1_i2  | 3.5     | 4.1    |
|                                                            |                                  |           |    |   |     |   | Cs21433 c0_g1_i1  | 0       | 0.34   |
|                                                            |                                  |           |    |   |     |   | Cs73306 c0_g1_i1  | 27.18   | 29.24  |
| F-actin-capping protein subunit alpha-2-like               | <i>Lingula anatina</i>           | 6.00E-169 |    |   | 52  | 1 | Cs83170 c0_g1_i1  | 37.69   | 72.2   |
|                                                            |                                  |           |    |   |     |   | Cs31098 c0_g1_i1  | 1.04    | 1.99   |

|                                             |                                |          |    |   |  |                  |        |        |
|---------------------------------------------|--------------------------------|----------|----|---|--|------------------|--------|--------|
| tyrosine-protein kinase receptor Tie-1-like | <i>Lingula anatina</i>         | 4.00E-09 | 57 | 1 |  | Cs33897 c6_g1_i7 | 26.47  | 44.23  |
|                                             |                                |          |    |   |  | Cs33897 c4_g1_i3 | 0.56   | 0      |
|                                             |                                |          |    |   |  | Cs33897 c4_g1_i4 | 1.7    | 0      |
|                                             |                                |          |    |   |  | Cs33897 c4_g1_i5 | 0      | 0.44   |
|                                             |                                |          |    |   |  | Cs33897 c6_g1_i4 | 68.56  | 21.8   |
|                                             |                                |          |    |   |  | Cs33897 c4_g1_i2 | 0.74   | 1.78   |
|                                             |                                |          |    |   |  | Cs33897 c6_g1_i1 | 50.57  | 79     |
|                                             |                                |          |    |   |  | Cs33897 c6_g1_i6 | 50.98  | 49.12  |
|                                             |                                |          |    |   |  | Cs33897 c6_g1_i5 | 47.34  | 0      |
|                                             |                                |          |    |   |  | Cs33897 c6_g1_i2 | 33.26  | 0      |
| NADP-dependent malic enzyme                 | <i>Crassostrea gigas</i>       | 0        | 57 | 1 |  | Cs92452 c0_g1_i1 | 2.44   | 8.79   |
| dipeptidyl peptidase 1-like isoform X1      | <i>Crassostrea virginica</i>   | 0.00E+00 | 55 | 1 |  | Cs92769 c1_g1_i1 | 70.84  | 14.85  |
|                                             |                                |          |    |   |  | Cs28054 c0_g1_i1 | 2.33   | 0.3    |
| nucleoside diphosphate kinase A             | <i>Crassostrea gigas</i>       | 1.00E-76 | 54 | 1 |  | Cs27778 c0_g1_i1 | 427.75 | 93.45  |
|                                             |                                |          |    |   |  | Cs27778 c0_g2_i1 | 0      | 650.63 |
|                                             |                                |          |    |   |  | Cs67705 c0_g1_i1 | 0      | 11.49  |
|                                             |                                |          |    |   |  | Cs67705 c0_g2_i1 | 9.01   | 0.85   |
| Phosphoenolpyruvate carboxykinase [GTP]     | <i>Lottia gigantea</i>         | 0.00E+00 | 53 | 1 |  | Cs63416 c0_g1_i1 | 0.72   | 1.31   |
|                                             |                                |          |    |   |  | Cs81194 c0_g1_i1 | 22.04  | 31.08  |
| alpha-L-fucosidase-like                     | <i>Mizuhopecten yessoensis</i> | 0        | 51 | 1 |  | Cs82886 c4_g3_i2 | 2.95   | 30.29  |
|                                             |                                |          |    |   |  | Cs82886 c4_g3_i4 | 4.73   | 0      |
| collagen alpha-1(XII) chain-like            | <i>Octopus bimaculoides</i>    | 5.00E-24 | 51 | 1 |  | Cs24988 c0_g1_i3 | 1.83   | 0.12   |
|                                             |                                |          |    |   |  | Cs24988 c0_g1_i4 | 0.42   | 0      |
|                                             |                                |          |    |   |  | Cs24988 c0_g1_i7 | 0      | 0      |
|                                             |                                |          |    |   |  | Cs24988 c0_g1_i8 | 10.12  | 1.23   |

<sup>a</sup> Annotation is based on the results of BlastP analysis

Table S5. List of the proteins identified from base plus membrane fraction of radular teeth in *Cryptochiton stelleri*

| Annotation <sup>a</sup>                                      | Best hit                         | E-value   | 1st analysis  |                    | 2nd analysis  |                    | Transcript ID    | FPKM (mineralized) | FPKM (non-mineralized) |        |
|--------------------------------------------------------------|----------------------------------|-----------|---------------|--------------------|---------------|--------------------|------------------|--------------------|------------------------|--------|
|                                                              |                                  |           | Mascot scores | number of peptides | Mascot scores | number of peptides |                  |                    |                        |        |
| inter-alpha-trypsin inhibitor heavy chain H3-like isoform X2 | <i>Lingula anatina</i>           | 3.00E-145 | 239           | 3                  | 81            | 2                  | Cs47656 c0_g1_i2 | 17.7               | 2.27                   |        |
|                                                              |                                  |           |               |                    |               |                    | Cs47656 c0_g1_i1 | 112                | 2.24                   |        |
| CD109 antigen-like isoform X2                                | <i>Crassostrea gigas</i>         | 0         | 233           | 5                  | 490           | 10                 | Cs78436 c2_g1_i1 | 110.87             | 0.26                   |        |
| zonadhesin-like                                              | <i>Parus major</i>               | 2.00E-26  | 233           | 3                  | 165           | 2                  | Cs19070 c4_g1_i2 | 39.29              | 1.14                   |        |
|                                                              |                                  |           |               |                    |               |                    | Cs23761 c3_g1_i1 | 2473.16            | 14.36                  |        |
| alpha tubulin-like                                           | <i>Lottia gigantea</i>           | 0         |               |                    |               | 134                | 2                | Cs81533 c0_g1_i1   | 1.48                   | 1.05   |
|                                                              |                                  |           |               |                    |               |                    |                  | Cs81533 c0_g2_i1   | 0                      | 1.22   |
|                                                              |                                  |           |               |                    |               |                    |                  | Cs88263 c0_g1_i1   | 189.83                 | 1835.9 |
|                                                              |                                  |           |               |                    |               |                    |                  | Cs88263 c0_g1_i3   | 901.4                  | 732.35 |
|                                                              |                                  |           |               |                    |               |                    |                  | Cs92361 c0_g1_i1   | 0                      | 10.36  |
|                                                              |                                  |           |               |                    |               |                    |                  | Cs92361 c1_g3_i1   | 18.12                  | 0.22   |
| hypothetical protein                                         | <i>Lottia gigantea</i>           | 2.00E-50  | 220           | 4                  | 79            | 2                  | Cs40476 c0_g1_i1 | 6.45               | 92.83                  |        |
|                                                              |                                  |           |               |                    |               |                    | Cs83855 c0_g1_i1 | 0.13               | 2.38                   |        |
| Actin                                                        | <i>Aplysia californica</i>       | 0         | 216           | 3                  | 99            | 3                  | Cs47470 c1_g1_i1 | 54.41              | 68.29                  |        |
|                                                              |                                  |           |               |                    |               |                    | Cs47470 c2_g3_i1 | 2810               | 5142.67                |        |
| actin                                                        | <i>Modiolus modiolus</i>         | 1.00E-86  | 194           | 1                  |               |                    | Cs75591 c0_g1_i1 | 2.78               | 0.29                   |        |
| CD109 antigen-like isoform X1                                | <i>Crassostrea gigas</i>         | 0         | 191           | 2                  | 61            | 1                  | Cs41242 c0_g1_i1 | 22.1               | 0                      |        |
|                                                              |                                  |           |               |                    |               |                    | Cs41242 c0_g1_i2 | 333.61             | 2.37                   |        |
|                                                              |                                  |           |               |                    |               |                    | Cs70978 c0_g1_i1 | 21.54              | 0                      |        |
|                                                              |                                  |           |               |                    |               |                    | Cs84232 c0_g1_i1 | 11.94              | 0                      |        |
| retrograde protein of 51 kDa-like isoform X4                 | <i>Crassostrea virginica</i>     | 3.00E-136 | 137           | 2                  | 178           | 3                  | Cs20050 c0_g2_i1 | 33.69              | 1.12                   |        |
|                                                              |                                  |           |               |                    |               |                    | Cs34327 c0_g1_i1 | 1683.79            | 60.17                  |        |
| No hits found                                                |                                  |           | 129           | 1                  | 68            | 1                  | Cs32565 c1_g1_i1 | 40.95              | 0                      |        |
|                                                              |                                  |           |               |                    |               |                    | Cs32565 c1_g1_i2 | 5.45               | 0.67                   |        |
| malate dehydrogenase, mitochondrial isoform X2               | <i>Aplysia californica</i>       | 0         | 121           | 1                  |               |                    | Cs75179 c0_g1_i1 | 77.41              | 43.32                  |        |
|                                                              |                                  |           |               |                    |               |                    | Cs75179 c0_g1_i2 | 0                  | 10.36                  |        |
| fibrillin-2-like                                             | <i>Lingula anatina</i>           | 0         | 113           | 3                  | 62            | 1                  | Cs22298 c0_g1_i2 | 5.07               | 0.31                   |        |
|                                                              |                                  |           |               |                    |               |                    | Cs22298 c0_g1_i4 | 0.97               | 0.05                   |        |
| uncharacterized protein LOC111636702                         | <i>Centruroides sculpturatus</i> | 4.00E-05  | 105           | 2                  | 263           | 3                  | Cs17650 c1_g2_i1 | 8.73               | 0                      |        |
|                                                              |                                  |           |               |                    |               |                    | Cs34146 c1_g1_i1 | 495.85             | 0.02                   |        |
|                                                              |                                  |           |               |                    |               |                    | Cs34146 c1_g1_i2 | 436.38             | 0.02                   |        |
| cell surface protein                                         | <i>Corynebacterium phoceense</i> | 2.00E-06  | 94            | 1                  |               |                    | Cs58933 c0_g1_i1 | 2.91               | 0                      |        |
|                                                              |                                  |           |               |                    |               |                    | Cs65631 c0_g1_i1 | 27.59              | 1.17                   |        |
| peroxidase-like                                              | <i>Lottia gigantea</i>           | 1.00E-152 | 80            | 1                  |               |                    | Cs81561 c0_g1_i1 | 1.51               | 0.35                   |        |
|                                                              |                                  |           |               |                    |               |                    | Cs11665 c0_g1_i1 | 6.87               | 74.38                  |        |
|                                                              |                                  |           |               |                    |               |                    | Cs49435 c0_g1_i1 | 3.19               | 193.6                  |        |
|                                                              |                                  |           |               |                    |               |                    | Cs54304 c1_g2_i1 | 110.53             | 2                      |        |
|                                                              |                                  |           |               |                    |               |                    | Cs54304 c1_g2_i2 | 53.84              | 69.25                  |        |
|                                                              |                                  |           |               |                    |               |                    | Cs54304 c1_g2_i3 | 6.3                | 104.23                 |        |



|                                         |                                 |          |    |   |     |   |                   |        |         |
|-----------------------------------------|---------------------------------|----------|----|---|-----|---|-------------------|--------|---------|
| tubulin beta chain                      | <i>Hydra vulgaris</i>           | 0        | 70 | 1 | 62  | 1 | Cs54304 c1_g2_i4  | 0      | 0       |
|                                         |                                 |          |    |   |     |   | Cs54304 c1_g2_i5  | 101.68 | 647.37  |
|                                         |                                 |          |    |   |     |   | Cs54304 c1_g2_i6  | 2.43   | 19.67   |
|                                         |                                 |          |    |   |     |   | Cs54304 c1_g4_i1  | 0.16   | 36.87   |
|                                         |                                 |          |    |   |     |   | Cs71671 c1_g2_i1  | 54.54  | 211.44  |
|                                         |                                 |          |    |   |     |   | Cs71671 c1_g3_i1  | 2.59   | 4.37    |
|                                         |                                 |          |    |   |     |   | Cs71671 c1_g3_i2  | 76.04  | 1.78    |
|                                         |                                 |          |    |   |     |   | Cs71671 c1_g3_i3  | 0      | 0       |
|                                         |                                 |          |    |   |     |   | Cs71671 c1_g3_i4  | 14.97  | 10.72   |
|                                         |                                 |          |    |   |     |   | Cs71671 c4_g2_i1  | 1.33   | 0       |
|                                         |                                 |          |    |   |     |   | Cs71671 c4_g2_i3  | 0      | 1.4     |
|                                         |                                 |          |    |   |     |   | Cs71671 c4_g2_i8  | 0.74   | 0       |
|                                         |                                 |          |    |   |     |   | Cs71671 c4_g3_i1  | 1.05   | 3.49    |
|                                         |                                 |          |    |   |     |   | Cs71671 c4_g2_i2  | 3.3    | 4.2     |
|                                         |                                 |          |    |   |     |   | Cs71671 c4_g2_i4  | 0      | 1.49    |
|                                         |                                 |          |    |   |     |   | Cs71671 c4_g2_i5  | 0      | 7.36    |
|                                         |                                 |          |    |   |     |   | Cs71671 c4_g2_i9  | 0.68   | 0       |
| No hits found                           |                                 |          | 62 | 1 |     |   | Cs43469 c0_g1_i1  | 2.01   | 0       |
|                                         |                                 |          |    |   |     |   | Cs85396 c0_g1_i1  | 151.1  | 0       |
| collagen alpha-1(XII) chain-like        | <i>Octopus bimaculoides</i>     | 9.00E-28 | 61 | 1 |     |   | Cs24988 c0_g1_i1  | 2.58   | 0       |
|                                         |                                 |          |    |   |     |   | Cs24988 c0_g1_i11 | 0.62   | 0.15    |
|                                         |                                 |          |    |   |     |   | Cs24988 c0_g1_i5  | 12.64  | 6.02    |
|                                         |                                 |          |    |   |     |   | Cs24988 c0_g1_i6  | 0      | 0       |
| uncharacterized protein<br>LOC110454775 | <i>Mizuhopecten yessoensis</i>  | 3.00E-24 | 57 | 1 |     |   | Cs61402 c0_g1_i1  | 2      | 2.88    |
|                                         |                                 |          |    |   |     |   | Cs61402 c0_g1_i2  | 7.16   | 1.49    |
|                                         |                                 |          |    |   |     |   | Cs75949 c0_g1_i1  | 379.51 | 272.39  |
| alpha tubulin-like                      | <i>Saccoglossus kowalevskii</i> | 0        | 56 | 1 | 126 | 2 | Cs20163 c0_g1_i1  | 111.79 | 165.29  |
|                                         |                                 |          |    |   |     |   | Cs36028 c0_g1_i1  | 0      | 17.03   |
|                                         |                                 |          |    |   |     |   | Cs36028 c0_g2_i1  | 0      | 0       |
|                                         |                                 |          |    |   |     |   | Cs36028 c0_g3_i1  | 0      | 0       |
|                                         |                                 |          |    |   |     |   | Cs43007 c0_g2_i1  | 0.44   | 30.38   |
|                                         |                                 |          |    |   |     |   | Cs43007 c0_g4_i1  | 16.57  | 2.92    |
|                                         |                                 |          |    |   |     |   | Cs64094 c0_g1_i1  | 0      | 10.52   |
|                                         |                                 |          |    |   |     |   | Cs64094 c0_g1_i2  | 4.73   | 34.2    |
|                                         |                                 |          |    |   |     |   | Cs72036 c0_g1_i1  | 1.42   | 1.72    |
|                                         |                                 |          |    |   |     |   | Cs88263 c0_g1_i1  | 189.83 | 1835.9  |
|                                         |                                 |          |    |   |     |   | Cs88263 c0_g1_i2  | 603.6  | 1986.65 |
|                                         |                                 |          |    |   |     |   | Cs88263 c1_g1_i1  | 0.97   | 16.82   |
|                                         |                                 |          |    |   |     |   | Cs88263 c1_g1_i2  | 7.73   | 13.5    |
|                                         |                                 |          |    |   |     |   | Cs88263 c1_g1_i3  | 6.88   | 11.91   |
|                                         |                                 |          |    |   |     |   | Cs88573 c0_g1_i1  | 0.66   | 3.55    |
| Cs92361 c0_g1_i1                        | 0                               | 10.36    |    |   |     |   |                   |        |         |

|                                                       |                               |          |    |   |     |   |                   |         |          |
|-------------------------------------------------------|-------------------------------|----------|----|---|-----|---|-------------------|---------|----------|
|                                                       |                               |          |    |   |     |   | Cs92361 c0_g1_i2  | 0.76    | 1.88     |
| No hits found                                         |                               |          | 54 | 1 |     |   | Cs78604 c1_g2_i2  | 20      | 0.68     |
| chitin binding beak protein 3                         | <i>Dosidicus gigas</i>        | 5.00E-10 | 53 | 1 | 65  | 1 | Cs12250 c0_g1_i1  | 3170.58 | 0.28     |
|                                                       |                               |          |    |   |     |   | Cs71549 c0_g1_i1  | 87.72   | 0        |
| No hits found                                         |                               |          | 52 | 1 | 51  | 1 | Cs17717 c0_g1_i3  | 38.82   | 11750.12 |
|                                                       |                               |          |    |   |     |   | Cs17717 c0_g1_i4  | 105.68  | 7613.02  |
|                                                       |                               |          |    |   |     |   | Cs17717 c1_g1_i1  | 0.63    | 122.76   |
|                                                       |                               |          |    |   |     |   | Cs17717 c1_g1_i4  | 0.58    | 206.04   |
|                                                       |                               |          |    |   |     |   | Cs17717 c0_g1_i2  | 21      | 3943.71  |
|                                                       |                               |          |    |   |     |   | Cs17717 c0_g1_i1  | 41.73   | 6108.95  |
| No hits found                                         |                               |          |    |   | 122 | 2 | Cs75160 c0_g1_i1  | 11.77   | 0        |
|                                                       |                               |          |    |   |     |   | Cs80392 c0_g1_i1  | 786.93  | 0        |
| putative cysteine proteinase CG12163                  | <i>Branchiostoma belcheri</i> | 9.00E-33 |    |   | 110 | 1 | Cs85860 c0_g2_i1  | 4.05    | 0        |
| uncharacterized protein LOC106869807                  | <i>Octopus bimaculoides</i>   | 6.00E-09 |    |   | 87  | 1 | Cs35465 c0_g1_i1  | 73.35   | 3.38     |
|                                                       |                               |          |    |   |     |   | Cs62172 c0_g1_i1  | 2.54    | 0        |
| tropomyosin-1 isoform X19                             | <i>Crassostrea virginica</i>  | 8.00E-65 |    |   | 68  | 1 | Cs85863 c1_g1_i3  | 0       | 26.24    |
|                                                       |                               |          |    |   |     |   | Cs21476 c0_g1_i1  | 2.56    | 2.92     |
|                                                       |                               |          |    |   |     |   | Cs21476 c0_g1_i2  | 2.5     | 0.29     |
|                                                       |                               |          |    |   |     |   | Cs85863 c1_g1_i1  | 150.91  | 107.33   |
|                                                       |                               |          |    |   |     |   | Cs85863 c1_g1_i2  | 35.78   | 4.81     |
| ependymin-related protein 1-like                      | <i>Lottia gigantea</i>        | 1.00E-33 |    |   | 64  | 1 | Cs63606 c4_g1_i1  | 0       | 0        |
|                                                       |                               |          |    |   |     |   | Cs63606 c4_g2_i1  | 15.21   | 2.52     |
|                                                       |                               |          |    |   |     |   | Cs44691 c0_g1_i1  | 605.89  | 110.22   |
| filamin-A isoform X14                                 | <i>Crassostrea gigas</i>      | 0        |    |   | 62  | 1 | Cs13902 c0_g1_i1  | 0.57    | 2.96     |
|                                                       |                               |          |    |   |     |   | Cs22318 c0_g1_i1  | 66.57   | 125.82   |
| transcription factor with AP2 domain(s), putative     | <i>Plasmodium malariae</i>    | 2.00E-04 |    |   | 60  | 1 | Cs22247 c2_g1_i1  | 331.87  | 0.21     |
|                                                       |                               |          |    |   |     |   | Cs22247 c2_g1_i3  | 123     | 0        |
|                                                       |                               |          |    |   |     |   | Cs22247 c3_g1_i12 | 0       | 0        |
|                                                       |                               |          |    |   |     |   | Cs22247 c3_g1_i3  | 4.24    | 0        |
|                                                       |                               |          |    |   |     |   | Cs22247 c3_g1_i9  | 2.98    | 0        |
| inter-alpha-trypsin inhibitor heavy chain H4, partial | <i>Acanthisitta chloris</i>   | 1.00E-09 |    |   | 56  | 1 | Cs48764 c0_g1_i1  | 1.01    | 0.26     |
| hypothetical protein LOTGIDRAFT_236297                | <i>Lottia gigantea</i>        | 3.00E-40 |    |   | 54  | 1 | Cs88032 c0_g1_i1  | 38.08   | 0.29     |
|                                                       |                               |          |    |   |     |   | Cs88032 c0_g1_i2  | 23.79   | 0.1      |

<sup>a</sup> Annotation is based on the results of BlastP analysis

Table S6. Localization analysis of mineralized cusp-specific proteins

| Transcript ID                 | Annotation <sup>a</sup>                     | Signal sequence prediction software |                      |                 |                   |              |
|-------------------------------|---------------------------------------------|-------------------------------------|----------------------|-----------------|-------------------|--------------|
|                               |                                             | SignalP                             | TargetP <sup>b</sup> | PSORT           | MultiLoc2         | Signal-BLAST |
| Cs77024 c0_g1_i1              | Neuroglobin-like                            |                                     |                      | cytosol         | cytoplasmic       |              |
| Cs77196 c0_g2_i1              | Myoglobin                                   |                                     |                      | cytosol         | secretory pathway |              |
| Cs75674 c0_g4_i1              | protein usf-like                            |                                     |                      | mitochondria    | secretory pathway | ○            |
| Cs82664 c0_g1_i1              | Arginine kinase                             |                                     | M                    | mitochondria    | cytoplasmic       |              |
| Cs18149 c2_g1_i5              | Peroxidasin                                 | ○                                   | S                    | plasma membrnae | secretory pathway | ○            |
| Cs68435 c0_g1_i1              | No hits found                               |                                     | S                    | extracellular   | secretory pathway | ○            |
| Cs83384 c0_g1_i1              | protein yellow-like                         | ○                                   | S                    | plasma membrnae | secretory pathway | ○            |
| Cs18149 c2_g1_i2 <sup>c</sup> | Peroxidasin                                 | ○                                   | S                    | plasma membrnae | secretory pathway | ○            |
| Cs62719 c1_g8_i1              | gastric intrinsic factor-like protein 2     | ○                                   | S                    | extracellular   | secretory pathway | ○            |
| Cs58153 c0_g2_i5              | apoptosis inducing factor-3                 |                                     |                      | mitochondria    | secretory pathway |              |
| Cs22616 c0_g1_i1              | copper transport protein ATOX1-like         |                                     |                      | extracellular   | cytoplasmic       |              |
| Cs28725 c1_g1_i1              | hillarin                                    |                                     | M                    | mitochondria    | cytoplasmic       |              |
| Cs84529 c0_g2_i1              | muscle-specific protein 20-like isoform X2  |                                     |                      | cytosol         | cytoplasmic       |              |
| Cs59400 c0_g1_i1              | Eukaryotic initiation factor 4A-II, partial |                                     |                      | nucleus         | nuclear           |              |
| Cs74134 c0_g2_i2 <sup>c</sup> | histone H2B 8-like                          |                                     |                      | nucleus         | nuclear           |              |
| Cs46312 c2_g1_i1              | hephaestin-like protein                     |                                     | S                    | plasma membrnae | secretory pathway | ○            |
| Cs54305 c0_g1_i2 <sup>c</sup> | filamin-A-like isoform X1                   |                                     |                      | nucleus         | cytoplasmic       |              |
| Cs59318 c0_g1_i1              | peroxiredoxin 6                             |                                     |                      | cytosol         | cytoplasmic       |              |
| Cs71263 c1_g1_i1              | Peroxidasin                                 | ○                                   | S                    | extracellular   | secretory pathway |              |
| Cs69741 c0_g1_i1              | superoxide dismutase (Cu-Zn)                | ○                                   | S                    | extracellular   | secretory pathway | ○            |
| Cs53984 c1_g2_i8              | filamin-A-like isoform X5                   |                                     |                      | cytosol         | cytoplasmic       |              |
| Cs28687 c2_g1_i1              | cytosolic malate dehydrogenase              |                                     |                      | mitochondria    | cytoplasmic       |              |

<sup>a</sup> Annotation is based on the results of BlastP analysis

<sup>b</sup> S, Secretory pathway; M, Mitochondrion

<sup>c</sup> cDNA of those proteins are likely truncated.
